# Supplementary material
Source: publisher site journal article supplement (https://www.dovepress.com/article/573471)
Supplement: Supplementary file 1 [file 573471%20Revised%20Supplemental%20Table%20S1.docx]

**Supplemental data**

**Supplemental Table S1.** Comparison of laboratory indicators between survival and non-survival cases in this study

| **Characteristics** | **non-Survival group (N=92)** | | | **Survival group (N=77)** | | ***P* value** | |
| --- | --- | --- | --- | --- | --- | --- | --- |
| Age (years, median with IQR) | | 63.5 (52.0-77.0) | | | 58.0 (49.0-69.0) | | 0.095 |
| Female (N, %) | 41 (44.6) | | | 21 (27.3) | | **0.020** | |
| Usage of antifungal agents (N, %) | 38 (41.3) | | | 23 (29.9) | | 0.123 | |
| Underlying conditions (N, %) |  | | |  | |  | |
| Transplantation | 3 (3.3) | | | 4 (5.2) | | 0.703 | |
| Immunodeficiency | 33 (35.9) | | | 22 (28.6) | | 0.313 | |
| Autoimmune diseases | 12 (13.0) | | | 8 (10.4) | | 0.595 | |
| Chronic kidney disease | 14 (15.2) | | | 7 (9.1) | | 0.229 | |
| Diabetes | 29 (31.5) | | | 15 (19.5) | | 0.076 | |
| Solid tumor | 12 (13.0) | | | 12 (15.6) | | 0.637 | |
| Liver disease | 31 (33.7) | | | 27 (35.1) | | 0.852 | |
| Hypertension | 31 (33.7) | | | 27 (35.1) | | 0.852 | |
| Cardiovascular disease | 39 (42.4) | | | 19 (24.7) | | **0.016** | |
| Chronic pulmonary disease | 16 (17.4) | | | 13 (16.9) | | 0.930 | |
| Clinical presentations (N, %) |  | | |  | |  | |
| Dyspnea | 15 (16.3) | | | 10 (13.0) | | 0.545 | |
| Fever | 24 (26.1) | | | 22 (28.6) | | 0.718 | |
| Hemoptysis | 2 (2.2) | | | 3 (3.9) | | 0.660 | |
| Expectoration | 26 (28.3) | | | 28 (36.4) | | 0.261 | |
| Radiological findings (N, %) |  | | |  | |  | |
| Septal thickening | 16 (17.4) | | | 17 (22.1) | | 0.444 | |
| Ground glass opacity | 35 (38.0) | | | 32 (41.6) | | 0.642 | |
| Multiple nodules | 36 (39.1) | | | 24 (31.2) | | 0.281 | |
| Air crescent sign | 12 (13.0) | | | 17 (22.1) | | 0.121 | |
| Pulmonary consolidation | 28 (30.4) | | | 23 (29.9) | | 0.937 | |
| **Complications (N, %)** |  | | |  | |  | |
| MODS | 13 (14.1) | | | 2 (2.60) | | **0.009** | |
| Septic shock | 34 (37.0) | | | 7 (9.1) | | **<0.001** | |
| Respiratory failure | 52 (56.5) | | | 23 (29.9) | | **<0.001** | |
| **Laboratory indicators [(median with IQR) or (N, %)]** | | | | | | | |
| PCT (ng/mL) | 1.4 (0.4-4.2) | | | 0.9 (0.2-3.1) | | 0.080 | |
| CRP (pg/mL) | 108.0 (61.1-176.0) | | | 78.5 (17.4-119.0) | | **0.013** | |
| IL-6 (pg/mL) | 187.0 (33.8-406.0) | | | 41.8 (16.1-136.0) | | **<0.001** | |
| LDH (U/L) | 355.0 (253.5-652.5) | | | 223.0 (161.0-349.0) | | **<0.001** | |
| WBC (×109/L) | 10.0 (7.2-14.1) | | | 7.6 (5.7-11.1) | | **0.006** | |
| Neutrophil (×109/L) | 8.3 (5.8-12.7) | | | 6.1 (3.7-8.6) | | **0.001** | |
| Neutrophil (%) | 88.9 (79.2-92.7) | | 78.0 (66.0-88.9) | | | **<0.001** | |
| Globulin (g/L) | 21.6 (17.0-26.5) | | 25.2 (19.4-30.3) | | | **0.006** | |
| Total protein (g/L) | 54.0 (48.4-60.6) | | 57.4 (51.3-66.4) | | | **0.008** | |
| CD4+ T (%) | 36.6 (25.6-48.2) | | 33.0 (21.7-44.0) | | | 0.215 | |
| CD8+ T (%) | 21.3 (16.0-28.9) | | 24.7 (18.1-34.3) | | | 0.338 | |
| CD4+/CD8+ ratio | 1.5 (1.0-2.9) | | 1.4 (0.7-2.1) | | | 0.179 | |
| Albumin (g/L) | 31.8 (27.7- 36.1) | | 32.8 (29.5- 36.1) | | | 0.347 | |
| Galactomannan (mg/mL) | 4.0 (2.4-5.2) | | 3.1 (2.0-4.7) | | | **0.035** | |
| GM-test result | 35 (38.0) | | 20 (26.0) | | | 0.133 | |
| ddPCR result | 19 (20.7) | | 8 (10.4) | | | 0.070 | |
| G-test result | 45 (48.9) | | 23 (29.9) | | | **0.012** | |

**Notes:** Intergroup comparisons between the survival and non-survival groups were analyzed using the Wilcoxon rank-sum test or the chi-square test, with a *P*-value <0.05 indicating statistical significance. Bold text indicates *P*< 0.05.

**Abbreviations:** IQR, interquartile range; MODS, multiple organ dysfunction syndrome; PCT, procalcitonin; CRP, C-reactive protein; IL-6, interleukin 6; LDH, lactate dehydrogenase; WBC, white blood cell; CD4+ T, CD4+ T lymphocyte; CD8+ T, CD8+ T lymphocyte; GM-test, galactomannan test; ddPCR, digital droplet PCR; G-test, (1, 3)-beta-D-glucan test.
